# Supplementary material for: Analysis of immune, microbiota and metabolome maturation in infants in a clinical trial of Lactobacillus paracasei CBA L74-fermented formula
Source: PubMed Central journal article supplement (PMC7264213; doi:10.1038/s41467-020-16582-1), 2020-06-01
Supplement: 41467_2020_16582_MOESM1_ESM.pdf [file 41467_2020_16582_MOESM1_ESM.pdf]

# Supplementary Information

Analysis of immune, microbiota and metabolome maturation in infants in a clinical trial of *Lactobacillus paracasei* CBA L74-fermented formula

Roggero et al.

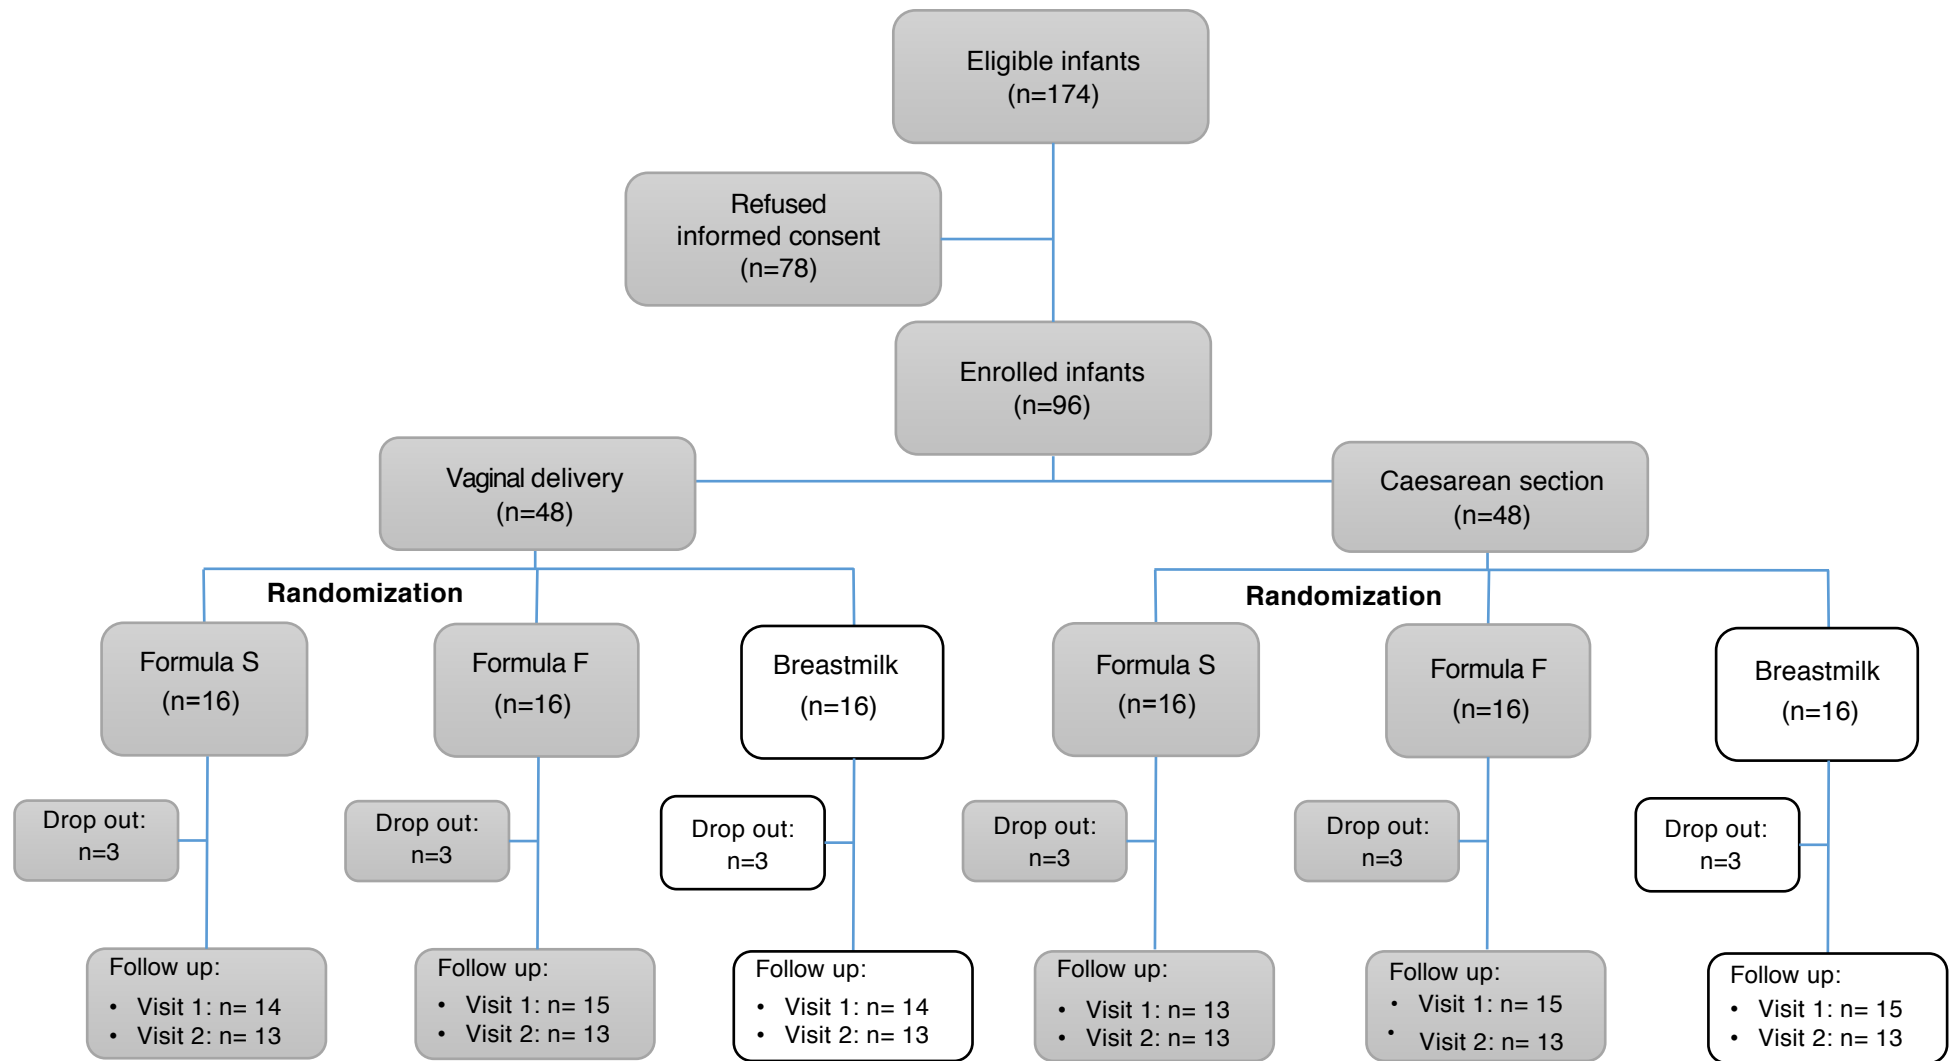

Supplementary Figure 1. Diagram showing the enrolment and follow up of participants.

**Supplementary Table 1 Basic characteristics at birth of infants included according to the mode of delivery and the type of feeding**

|                                | Vaginal Delivery    |                     |                      | Caesarean section   |                     |                      |
|--------------------------------|---------------------|---------------------|----------------------|---------------------|---------------------|----------------------|
| Dietary regimen                | Formula S<br>(n=13) | Formula F<br>(n=13) | Breastmilk<br>(n=13) | Formula S<br>(n=13) | Formula F<br>(n=13) | Breastmilk<br>(n=13) |
| <b>Weight (g)</b>              | 3264 ± 340          | 3253 ± 455          | 3314 ± 363           | 3123 ± 305          | 3196 ± 347          | 3302 ± 440           |
| <b>Length (cm)</b>             | 49.9 ± 1.5          | 49.3 ± 1.3          | 49.9 ± 1.9           | 49.0 ± 1.6          | 49.3 ± 1.9          | 49.9 ± 1.6           |
| <b>Head circumference (cm)</b> | 33.8 ± 0.8          | 33.8 ± 1.1          | 34.3 ± 1.0           | 34.1 ± 1.0          | 34.5 ± 1.0          | 34.0 ± 1.3           |
| <b>Males n (%)</b>             | 6 (50.0)            | 2 (15.3)            | 5 (38.5)             | 5 (41.6)            | 4 (33.3)            | 4 (33.3)             |

No differences in anthropometric measurements were found among groups at birth. Analysis of variance was used to assess differences in continuous variables and the  $\chi^2$  test for comparisons discrete variables between groups.

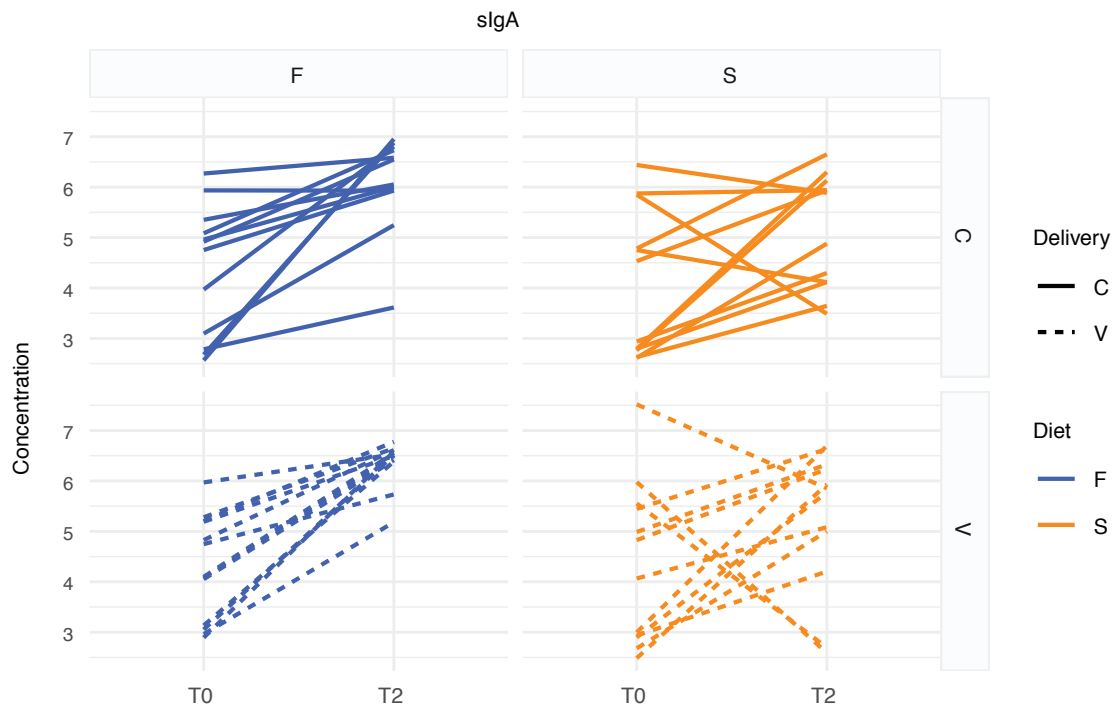

### Supplementary Figure 2. Fermented formula drives more sIgA than Standard formula.

sIgA levels according to mode of delivery and type of feeding were determined in fecal samples and are represented at T0 and T2. Each individual infant is represented by a line (solid lines caesarean delivery, C; dotted lines vaginal delivery, V). F and S fed infants show significantly different trajectories of IgAs levels between T0 and T2, with F fed infants displaying higher levels of IgAs and all increasing from T0 to T2 (ANOVA  $P = 0.010$ ). Simple effects T0-T2: F diet (Caesarean  $P = 0.0018$ , Vaginal  $P = 3.38E-05$ ), S diet (Caesarean  $P = 0.779$ , Vaginal  $P = 0.902$ ). Significance determined accounting for individual baselines with a linear mixed model, ANOVA to test the interaction between groups and time and Tukey post-hoc test. Data are shown in  $\log_2$  scale. Source data are provided as a Source Data file.

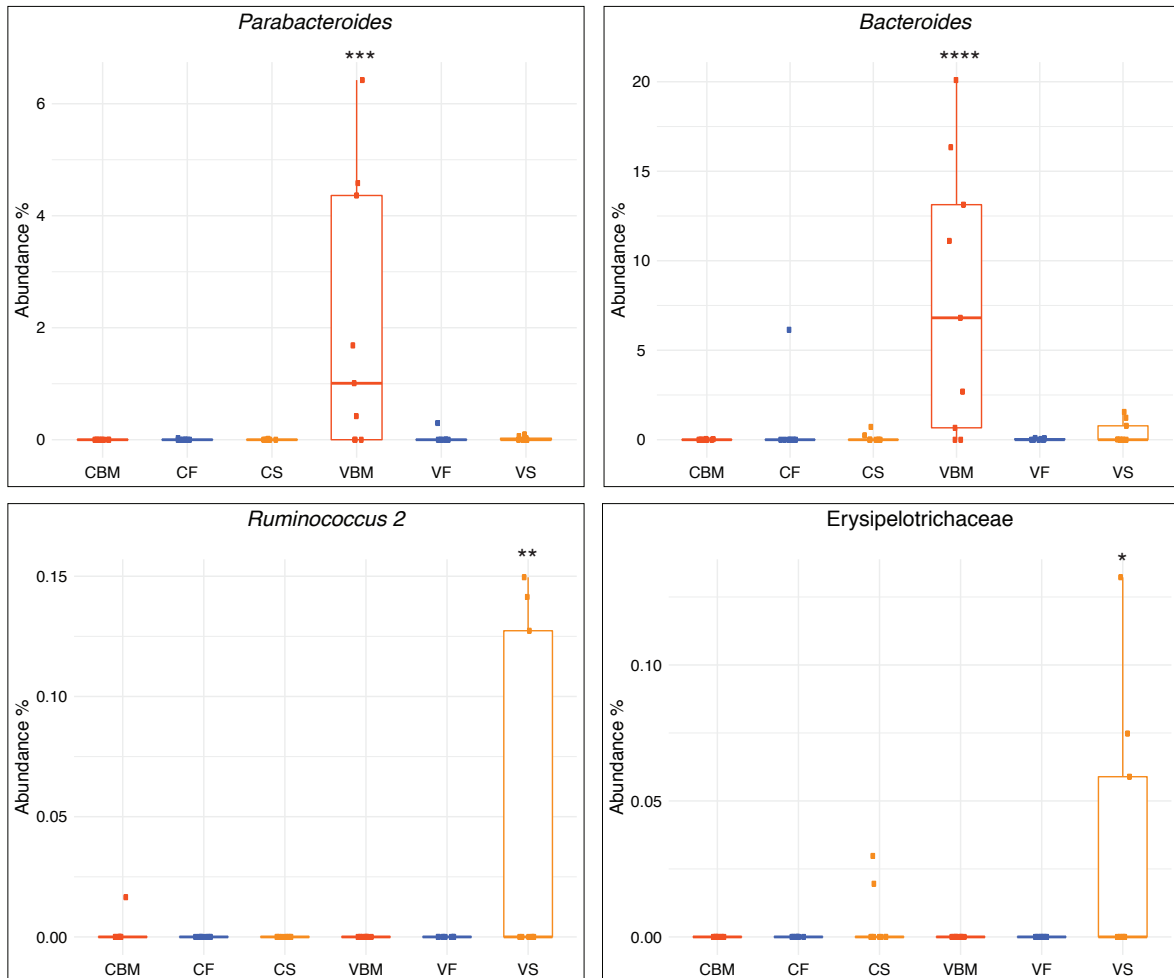

**Supplementary Figure 3. Bacterial genera enriched in the different diet groups by mode of delivery at visit 2.** Box plots showing differential abundance of *Parabacteroides*, *Bacteroides*, *Ruminococcus 2* and *Erysipelotrichaceae*. Box plots show the interquartile range (IQR), the horizontal lines show the median values and the whiskers extends from the hinge no further than 1.5 \* IQR. Each dot represents individual newborns. CBM: caesarean delivery breastmilk feeding; CF: caesarean delivery fermented formula feeding; CS: caesarean delivery standard formula feeding; VBM: vaginal delivery breastmilk feeding; VF: vaginal delivery fermented formula feeding; VS: vaginal delivery standard formula feeding. n = 9 infants per group. Significance determined by ANOVA. \* $P < 0.05$ , \*\* $P < 0.01$ , \*\*\* $P < 0.001$ , \*\*\*\* $P < 0.0001$ . Significant Tukey post-hoc comparisons are shown in Supplementary Table 2. Source data are provided as a Source Data file.

**Supplementary Table 2 List of significant bacterial genera showing different abundance across the diet groups by mode of delivery at T2**

| Genus                  | ANOVA $p$ -value <sup>a</sup> | TukeyHSD post-hoc test <sup>b</sup>                                                                              |
|------------------------|-------------------------------|------------------------------------------------------------------------------------------------------------------|
| <i>Bacteroides</i>     | 8.80856E-06                   | VBM-CBM $P = 6.4E-05$ , VBM-CF $P = 0.0002$ , VBM-CS $P = 8.0E-05$ , VF-VBM $P = 6.76E-05$ , VS-VBM $P = 0.0001$ |
| <i>Parabacteroides</i> | 0.000138412                   | VBM-CBM $P = 0.0008$ , VBM-CF $P = 0.0008$ , VBM-CS $P = 0.0008$ , VF-VBM $P = 0.0010$ , VS-VBM $P = 0.0009$     |
| <i>Ruminococcus 2</i>  | 0.004829657                   | VS-CBM $P = 0.0208$ , VS-CF $P = 0.0144$ , VS-CS $P = 0.0144$ , VS-VBM $P = 0.0144$ , VS-VF $P = 0.0144$         |
| Erysipelotrichaceae    | 0.01761655                    | VS-CBM $P = 0.0364$ , VS-CF $P = 0.0364$ , VS-VBM $P = 0.0364$ , VS-VF $P = 0.0364$                              |

<sup>a,b</sup>Significance determined by ANOVA and Tukey post-hoc test.  $n = 9$  infants per delivery-diet group.

<sup>b</sup>Comparisons between groups with significant post-hoc analysis ( $P < 0.05$ ).

**Supplementary Table 3 List of significant bacterial genera showing different abundance across the diet groups at T2**

| <b>Genus</b>                      | <b>ANOVA <i>p</i>-value<sup>a</sup></b> | <b>TukeyHSD post-hoc<sup>b</sup></b>         |
|-----------------------------------|-----------------------------------------|----------------------------------------------|
| <i>Bacteroides</i>                | 0.008937096                             | F-BM <i>P</i> = 0.022, S-BM <i>P</i> = 0.018 |
| <i>Parabacteroides</i>            | 0.013187348                             | F-BM <i>P</i> = 0.028, S-BM <i>P</i> = 0.027 |
| <i>Clostridium innocuum</i> group | 0.029880051                             | S-F <i>P</i> = 0.035, S-BM <i>P</i> = 0.090  |
| Erysipelotrichaceae               | 0.020307833                             | S-BM <i>P</i> = 0.039, S-F <i>P</i> = 0.039  |
| <i>Veillonella</i>                | 0.008703064                             | F-BM <i>P</i> = 0.025, S-BM <i>P</i> = 0.015 |
| <i>Ruminococcus 2</i>             | 0.047468236                             | S-BM <i>P</i> = 0.088, S-F <i>P</i> = 0.072  |

<sup>a,b</sup>Significance determined by ANOVA and Tukey post-hoc test. n = 18 infants per diet group.

<sup>b</sup>Comparisons between groups with significant post-hoc analysis (*P* < 0.05).

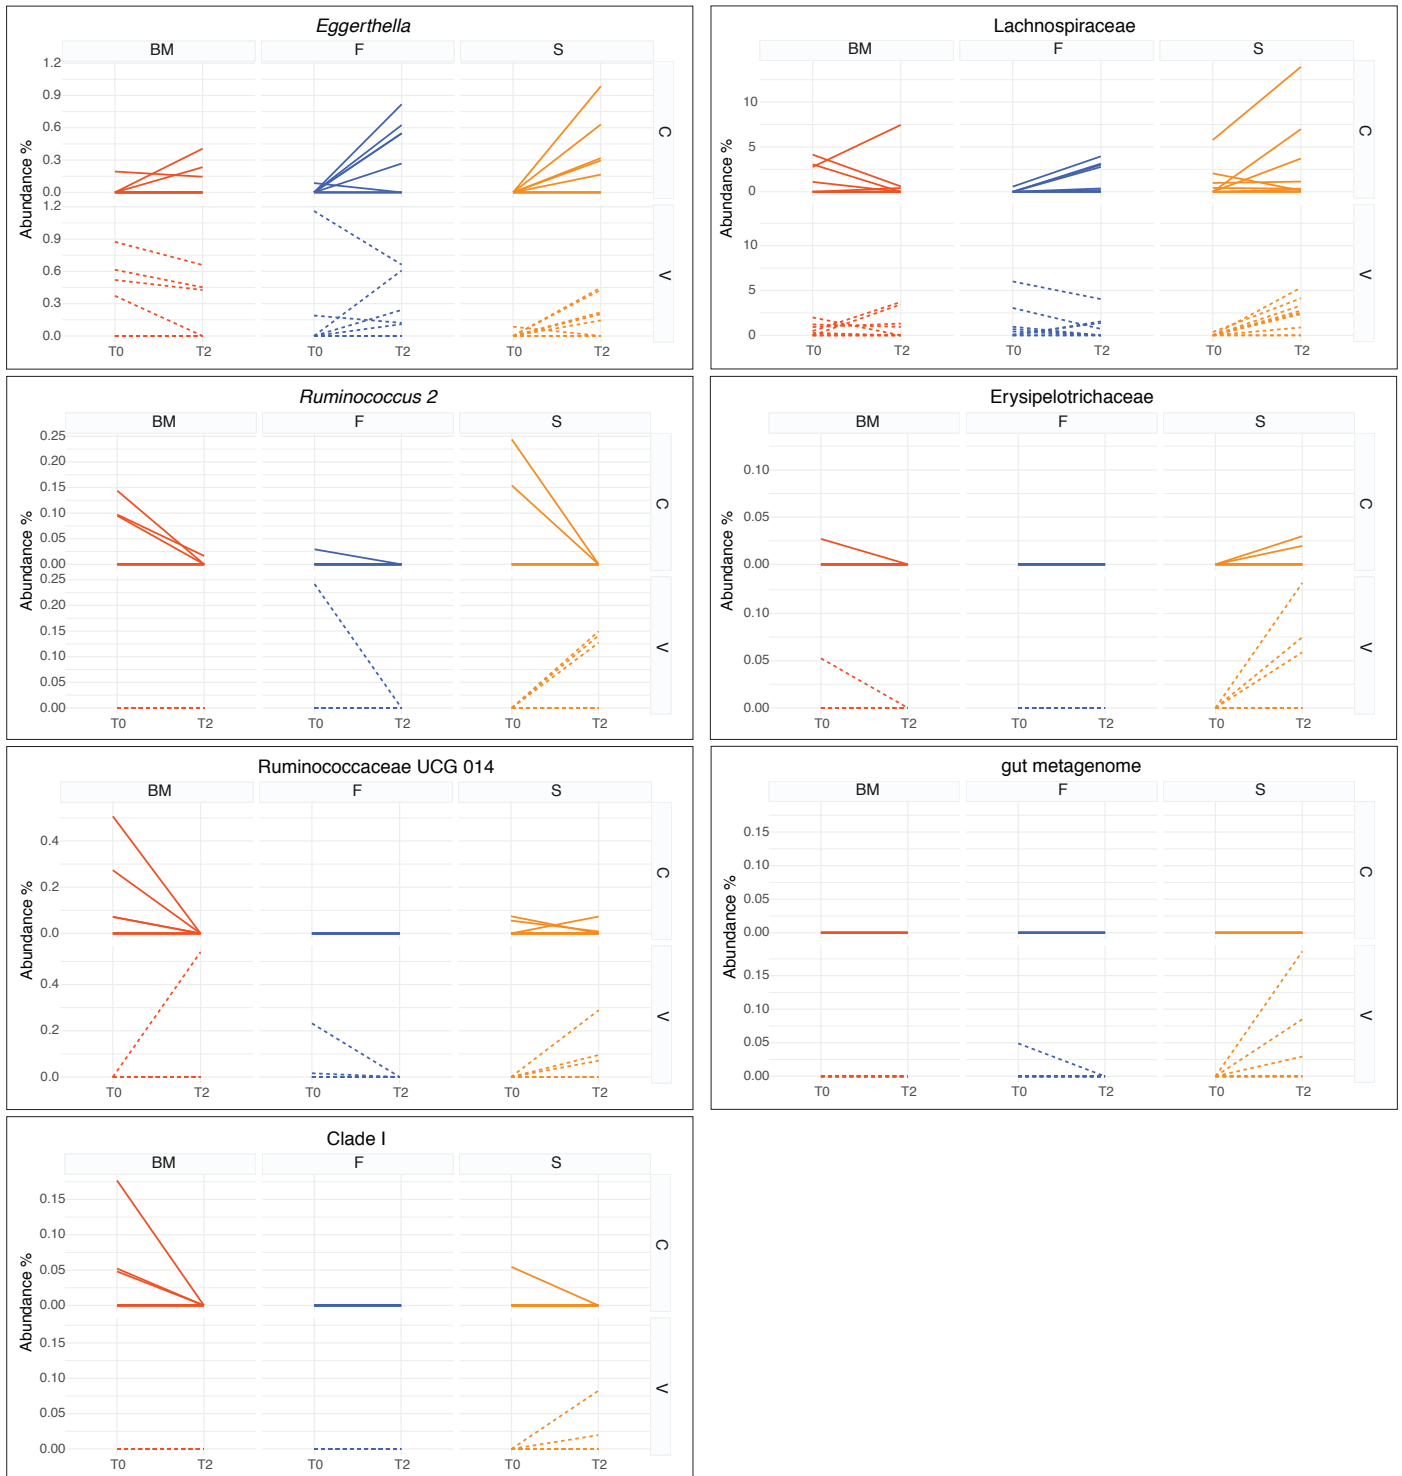

**Supplementary Figure 4. Bacterial genera trends in the different diet groups by mode of delivery for each individual infant between T0 and T2.** Interaction plots of abundance of statistically different genera (T0-T2) according to diets and delivery mode. Each line represents individual newborns (solid lines caesarean delivery, C; dotted lines vaginal delivery, V). Significance determined accounting for individual baselines with a linear mixed model and ANOVA to test the interaction between groups and time. ANOVA *P* value: *Eggerthella* *P* = 0.011, Lachnospiraceae *P* = 0.028, *Ruminococcus 2* *P* = 0.019, Erysipelotrichaceae *P* = 0.005, Ruminococcaceae UCG 014 *P* = 0.029, gut metagenome *P* = 0.020, Clade I *P* = 0.027. BM: breastmilk feeding; F: fermented formula feeding; S: standard formula feeding. Source data are provided as a Source Data file.



## Similar trend between F and S formulas

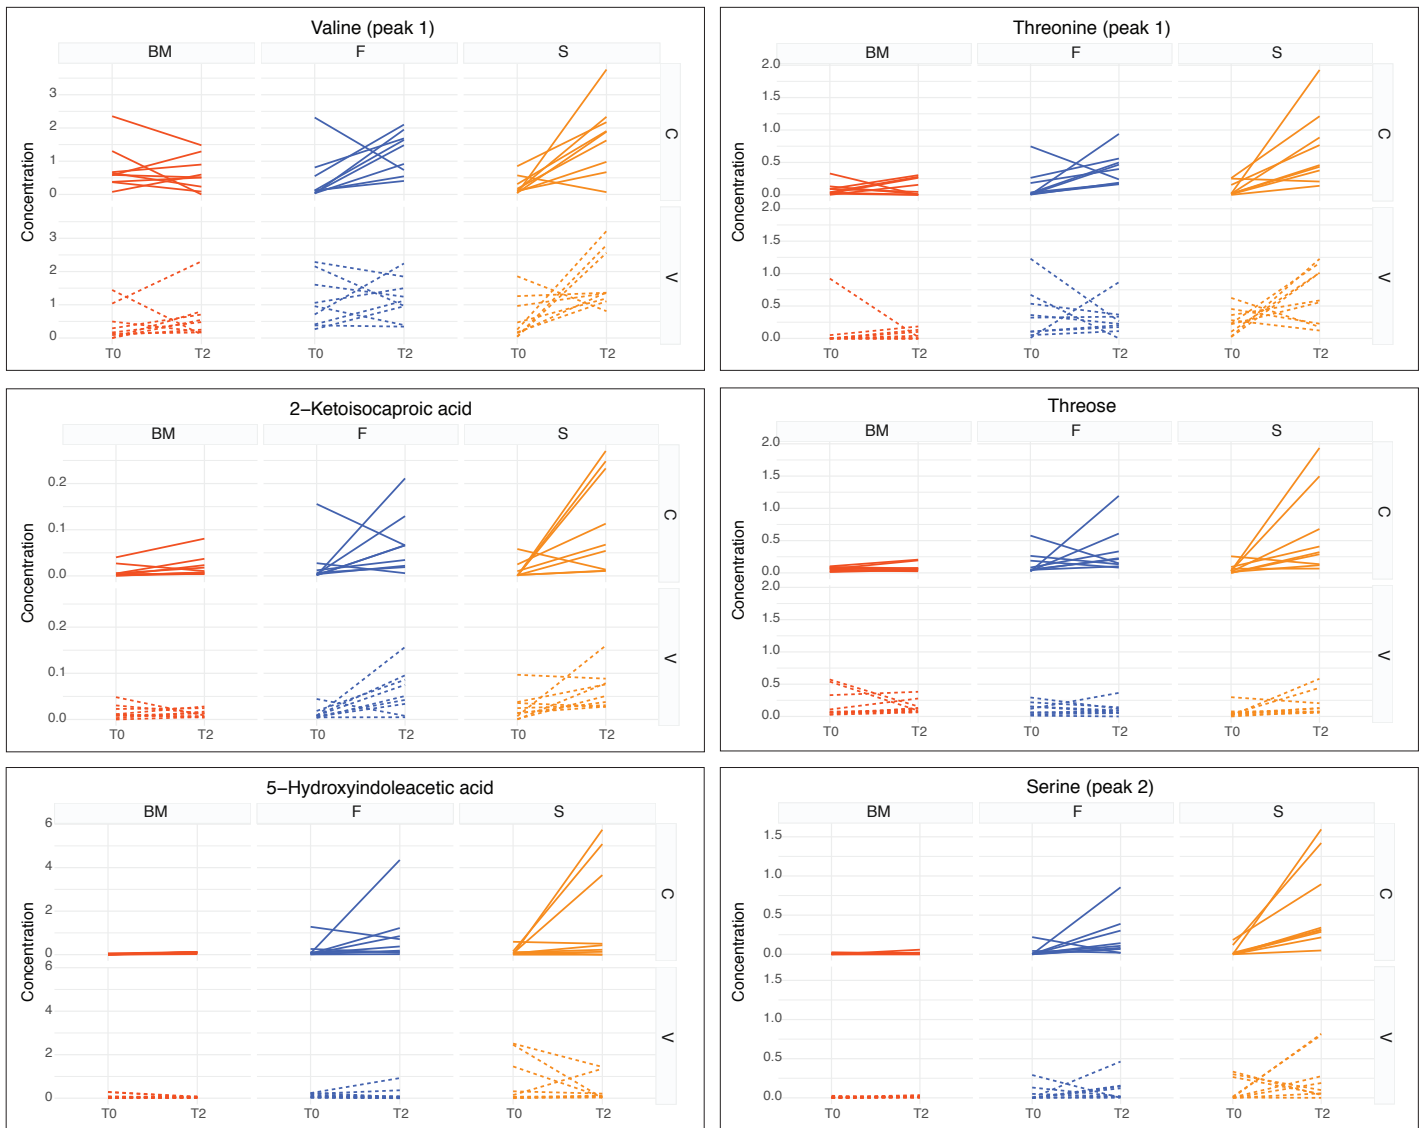

## Similar trend of F formula versus reference group

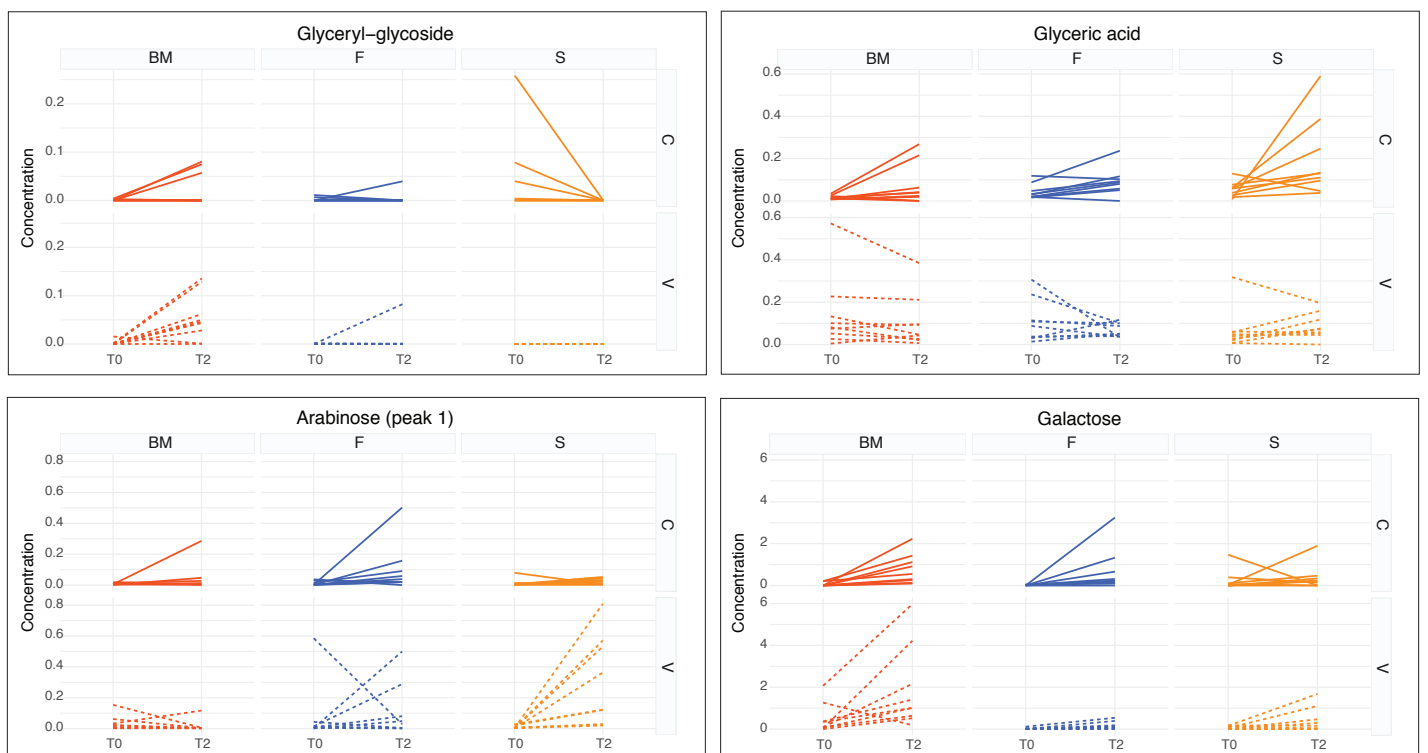

# Reduced or absent in formula fed versus the reference group

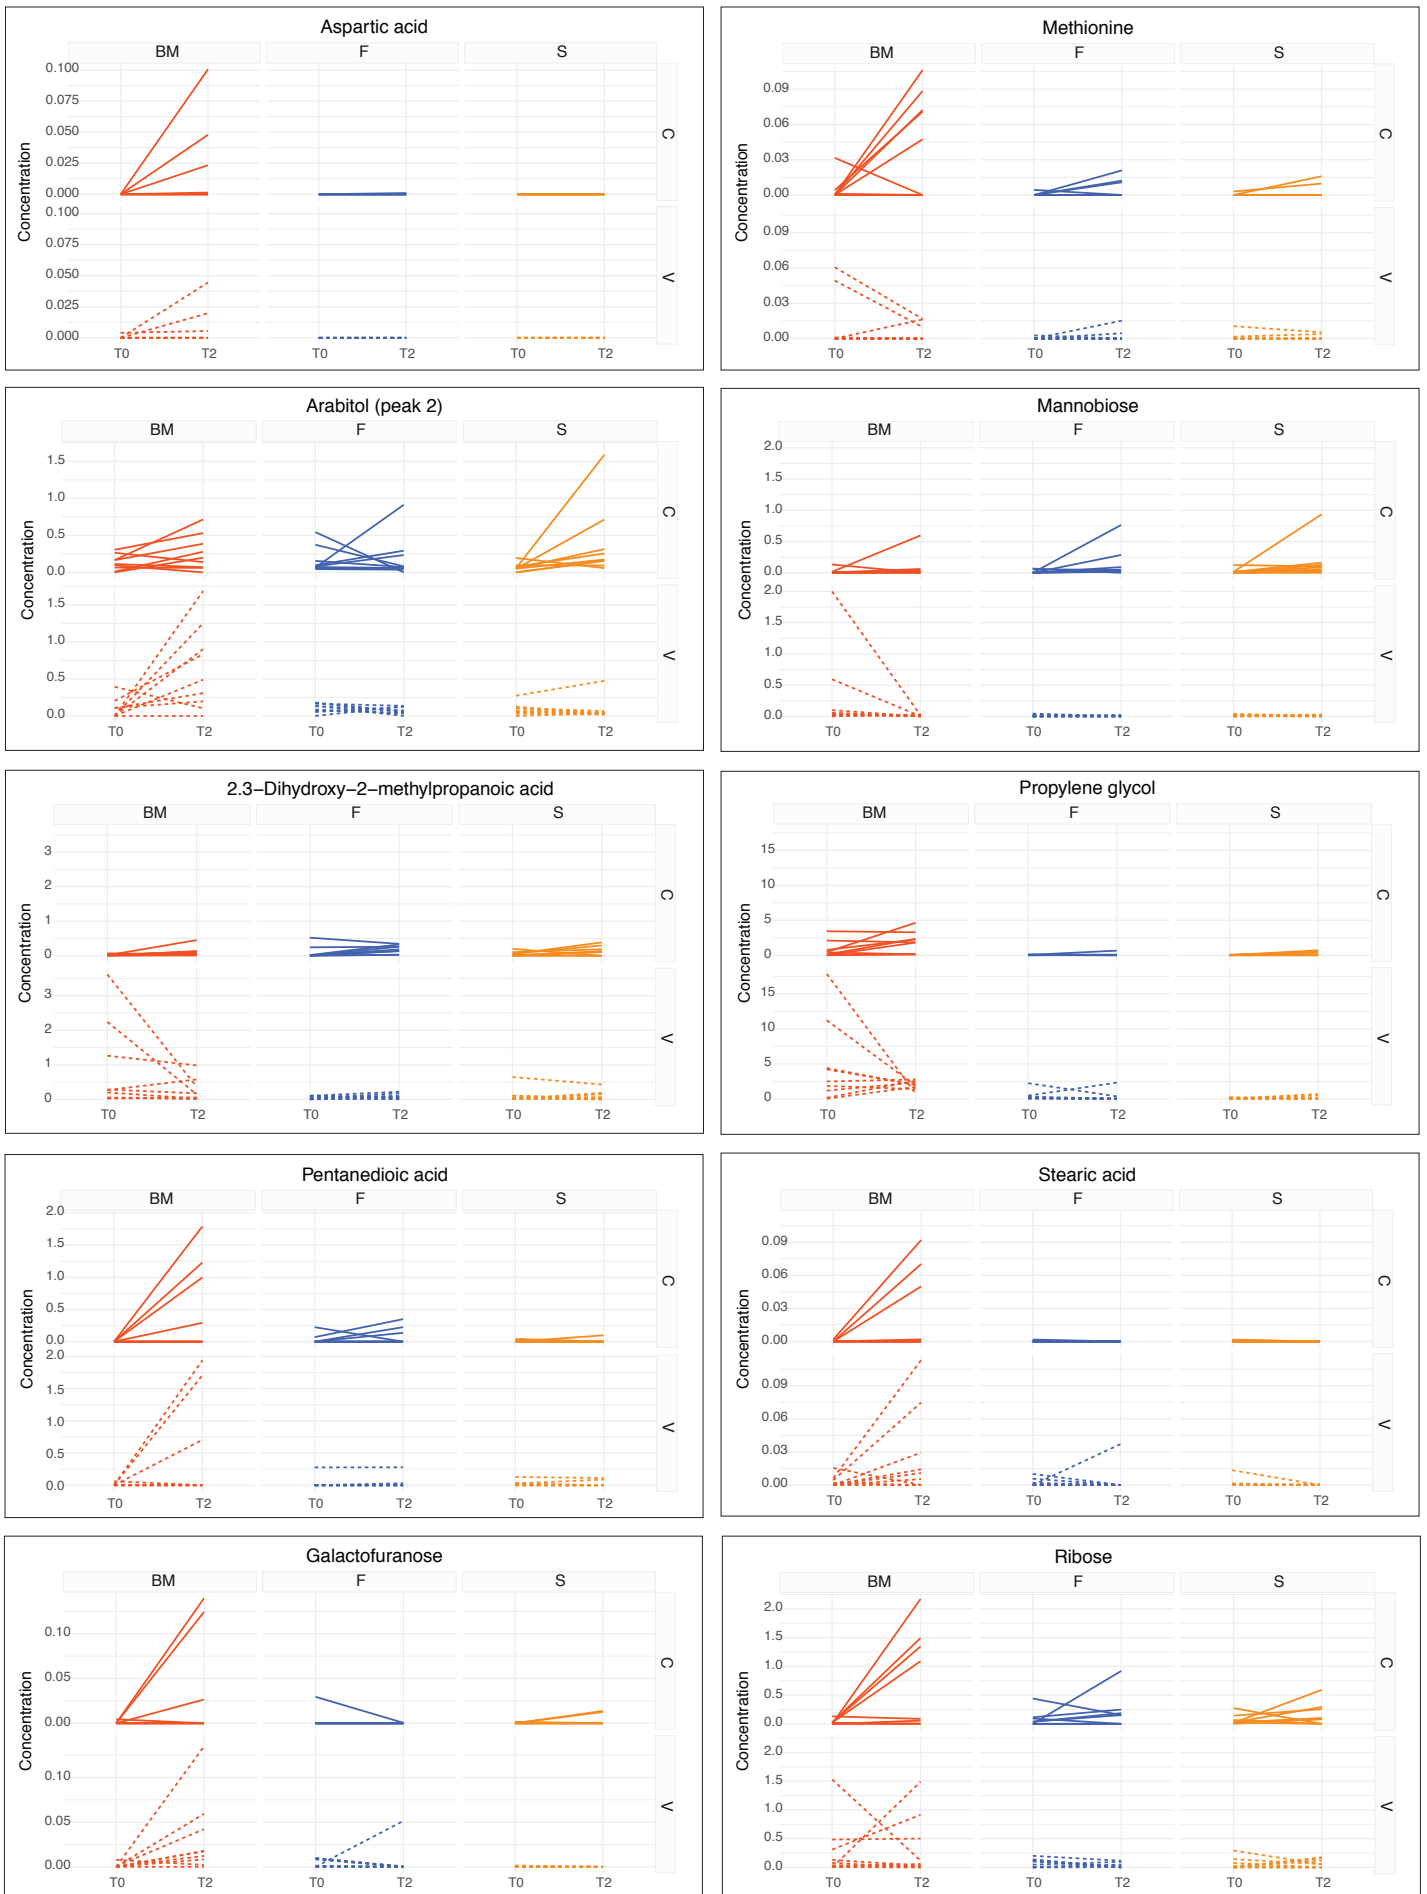

<

**Supplementary Figure 5. Metabolite trends in the different diet groups by mode of delivery for each individual infant between T0 and T2.** Interaction plots of abundance of statistically different metabolites (T0-T2) according to diets and delivery mode. Each line represents individual newborns (solid lines caesarean delivery, C; dotted lines vaginal delivery, V). Significance determined accounting for individual baselines with a linear mixed model and ANOVA to test the interaction between groups and time. ANOVA *P* value: Valine peak 1 *P* = 0.0012, Threonine peak 1 *P* = 0.0005, 2-Ketoisocaproic acid *P* = 0.0107, Threose *P* = 0.00270, 5-Hydroxyindoleacetic acid *P* = 0.0068, Serine peak 2 *P* = 0.0005, Glyceryl glycoside *P* = 0.0004, Glyceric acid *P* = 0.0041, Arabinose peak 1 *P* = 0.0040, Galactose *P* = 0.0404, Aspartic acid *P* = 0.0322, Methionine *P* = 0.0001, Arabitol peak 2 *P* = 0.0024, Mannobiose *P* = 0.0238, 2-3-Dihydroxy-2-methylpropanoic acid *P* = 0.0168, Propylene glycol *P* = 0.0276, Pentanedioic acid *P* = 0.0137, Stearic acid *P* = 0.0158, Galactofuranose *P* = 0.0172, Ribose *P* = 0.0155. BM: breastmilk feeding; F: fermented formula feeding; S: standard formula feeding. Source data are provided as a Source Data file.

| Supplementary Table 4 Primers used in this study |                            |      |             |     |                         |      |
|--------------------------------------------------|----------------------------|------|-------------|-----|-------------------------|------|
| Primer Name                                      | Adapter Sequence           | Key  | Tag barcode | GAT | Primer Sequence (5'-3') | Ref. |
| Probio_Uni                                       | CCATCTCATCCCTGCGTGTCTCCGAC | TCAG | TTGGAGTGTC  | GAT | CCTACGGGRSGCAGCAG       | 55   |
| Probio_Rev                                       | CCTCTCTATGGGCAGTCGGTGAT    |      |             |     | ATTACCGCGGCTGCT         | 55   |
