# Supplementary material for: Analysis of immune, microbiota and metabolome maturation in infants in a clinical trial of Lactobacillus paracasei CBA L74-fermented formula
Source: PubMed Central journal article supplement (PMC7264213; doi:10.1038/s41467-020-16582-1), 2020-06-01
Supplement: 41467_2020_16582_MOESM3_ESM.pdf [file 41467_2020_16582_MOESM3_ESM.pdf]

## Description of Additional Supplementary Files

File Name: Supplementary Data 1

Description: Study Protocol Document
